# Supplementary material
Source: Springer Nature journal article supplement (https://www.springermedizin.de/resource/supplementary/12891_2011_1327_MOESM2_ESM.pdf/9507580)
Supplement: MOESM2 [file 9507580]

Over 60-yr-old HF patients  
living in the catchment area , 296

Interested in and further  
informed of the study, 161

Unable to consent due  
to poor cognition, 7  
Not interested, 18

Recruited, 136

Excluded, 35

- Alcoholism, 3
- Poor health, 24
- Deceased, 1
- Discharged to an  
institution, 4
- Wrong diagnose, 3

Not interested, 20

Randomized, 81

Intervention, 40

Control, 41
